# Supplementary material
Source: PubMed Central journal article supplement (PMC3422104)
Supplement: supp_12-10070_IOVS-12-10070-s01.pdf [file supp_12-10070_IOVS-12-10070-s01.pdf]

**Supplementary Table S1. Comparison of *Rpgr* mutant mice**

| Mutant                                            | Rod ERG [% of WT] |     |     |      |       |    |     | Cone ERG [% of WT] |     |      |       |     |     |     | ONL Thickness [% of WT] |      |       |     |    |                     | Altitudinal effect |
|---------------------------------------------------|-------------------|-----|-----|------|-------|----|-----|--------------------|-----|------|-------|-----|-----|-----|-------------------------|------|-------|-----|----|---------------------|--------------------|
|                                                   | Age [m]           |     |     |      |       |    |     | Age [m]            |     |      |       |     |     |     | Age [m]                 |      |       |     |    |                     |                    |
|                                                   | < 2               | 3-5 | 6-8 | 9-10 | 11-16 | 24 | < 2 | 3-5                | 6-8 | 9-10 | 11-16 | 24  | < 2 | 3-5 | 6-8                     | 9-10 | 11-16 | 24  |    |                     |                    |
| <i>Rpgr</i> <sup>ΔEx4</sup> BALB/c <sup>1</sup> * |                   | 83  | 88  | 85   | 75    | 70 |     | 70                 | 75  | 65   | 62    | 40  |     | 100 | 100                     | 100  | 85    | 85  | nr |                     |                    |
| <i>Rpgr</i> <sup>ΔEx4</sup> BL/6 <sup>1</sup> *   |                   | 95  | 87  | 85   | 70    | 80 |     | 100                | 100 | 100  | 80    | 100 |     | 100 | 100                     | 90   | 90    | 85  | nr |                     |                    |
| <i>rd9</i> <sup>2</sup> *                         |                   | 90  | 60  |      | 50    | 35 |     | 80                 | 70  |      | 50    | 35  |     | 100 |                         |      | 80    | 50  | nr |                     |                    |
| <i>Rpgr</i> -null <sup>3,4,5</sup> *              |                   | 100 |     | 75   |       | 50 |     |                    |     | 69   |       | 40  |     | 95† |                         | 65†  |       | 55† | 50 | nr                  |                    |
| <i>Rpgr</i> -null + ORF15 Tg (#1) <sup>4</sup> *  |                   | 10  |     |      |       |    | nr  |                    |     |      |       |     |     | 50  | 10†                     |      |       |     |    | nr                  |                    |
| <i>Rpgr</i> -null + ORF15 Tg (#2) <sup>5</sup> *  |                   |     |     |      |       | 70 |     |                    |     |      |       | 70  |     |     |                         |      |       | 95† |    | nr                  |                    |
| <i>Rpgr</i> -null + mRDef <sup>6</sup> *          | nr                |     |     |      |       |    |     | nr                 |     |      |       |     |     |     | 50†                     | 20†  |       | 0   |    | nr                  |                    |
| <i>Rpgr</i> -null + mRORF <sup>6</sup> *          | nr                |     |     |      |       |    |     | nr                 |     |      |       |     |     |     | 100                     |      |       |     |    |                     | nr                 |
| <i>Rpgr</i> -cko                                  |                   |     | 65  | 60   | 52    | 23 |     |                    | 60  | 55   | 50    | 17  |     |     | 85                      | 73   | 74    | 35  |    | Observed by 11-15 m |                    |

\* Data from original publication (stated in text or extracted from plots).

† Estimated from histology illustrations.

nr: not reported

Vertical bars to the left of each subsection of data: gray bars mark the 100% level for comparison; dark bars reproduce the numerical data, when reported, shown to the right.

## References

1. Brunner S, Skosyrski S, Kirschner-Schwabe R, et al. Cone versus rod disease in a mutant *Rpgr* mouse caused by different genetic backgrounds. *Invest Ophthalmol Vis Sci.* 2010;51:1106-1115.
2. Thompson DA, Khan NW, Othman MI et al. Rd9 is a naturally occurring mouse model of a common form of retinitis pigmentosa caused by mutations in RPGR-ORF15. *PLoS One.* 2012;7:e35865.
3. Hong DH, Pawlyk BS, Shang J, Sandberg MA, Berson EL, Li T. A retinitis pigmentosa GTPase regulator (RPGR)-deficient mouse model for X-linked retinitis pigmentosa (RP3). *Proc Natl Acad Sci U S A.* 2000 Mar 28;97(7):3649-3654.
4. Hong DH, Pawlyk BS, Adamian M, and Li T. Dominant, gain-of-function mutant produced by truncation of RPGR. *Invest Ophthalmol Vis Sci.* 2004;45:36-41.
5. Hong DH, Pawlyk BS, Adamian M, Sandberg MA, and Li T. A single, abbreviated RPGR-ORF15 variant reconstitutes RPGR function in vivo. *Invest Ophthalmol Vis Sci.* 2005;46:435-41.
6. Wright RN, Hong DH, and Perkins B. Misexpression of the constitutive RPGRex1-19 variant leads to severe photoreceptor degeneration. *Invest Ophthalmol Vis Sci.* 2012;52:5189-5201.
